# Supplementary material for: Reactive Oxygen Species as a Response to Wounding: In Vivo Imaging in Arabidopsis thaliana
Source: PubMed Central journal article supplement (PMC6962234; doi:10.3389/fpls.2019.01660), 2020-01-09
Supplement: DataSheet_2.pdf [file DataSheet_2.pdf]

## Supplementary data 2

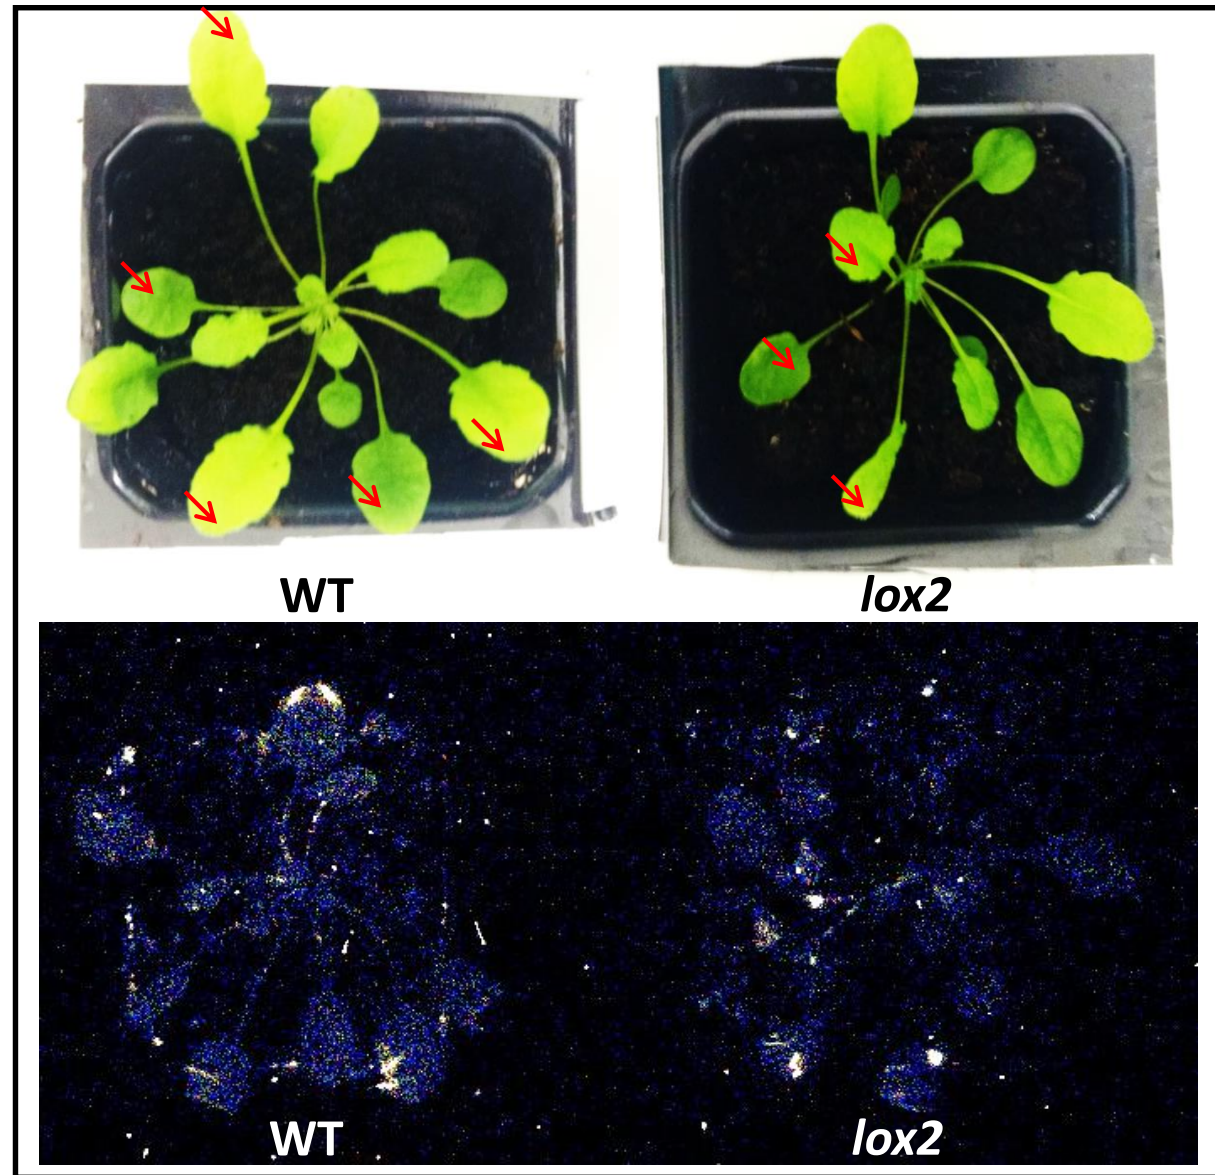

**Supplementary data 2:** Two-dimensional imaging of the ultra-weak photon emission from the *Arabidopsis thaliana*. The photographs (upper panel) and the corresponding two-dimensional images of spontaneous ultra-weak photon emission (lower panel). Ultra-weak photon emission imaging was measured in WT *Arabidopsis* plant and *lox2* mutant with an integration time of 30 min. The arrows in red indicate the mechanically injured part of the leaves.
